# Supplementary material
Source: PubMed Central journal article supplement (PMC6043849)
Supplement: EMBJ-37-e98699-s007.pdf [file EMBJ-37-e98699-s007.pdf]

Figure 4A

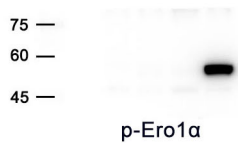

p-Ero1α

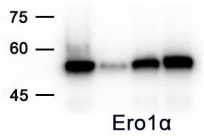

Ero1α

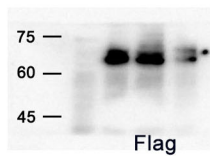

Flag

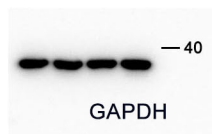

GAPDH

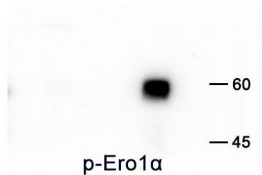

p-Ero1α

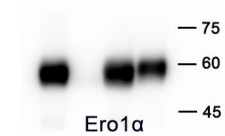

Ero1α

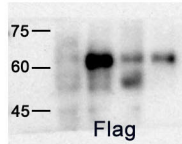

Flag

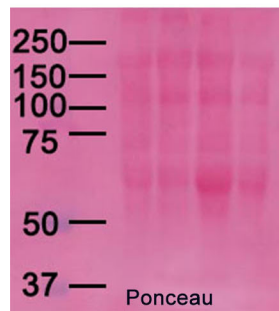

Ponceau

Figure 4C

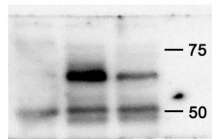

p-Ero1α

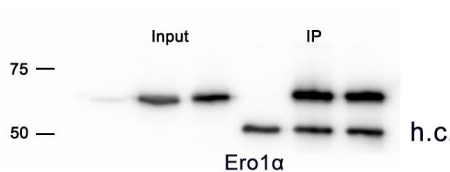

Ero1α

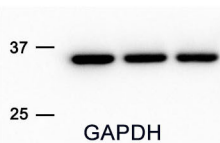

GAPDH

Extracts

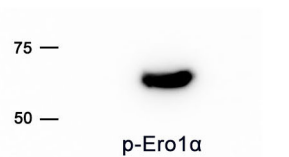

p-Ero1α

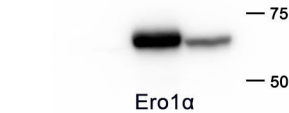

Ero1α

Medium

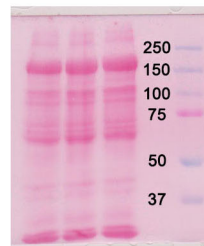

Ponceau

Figure 4D

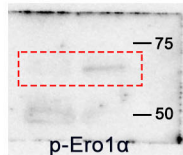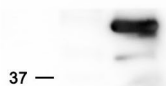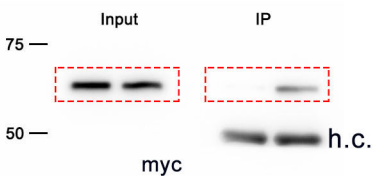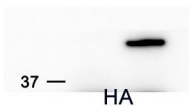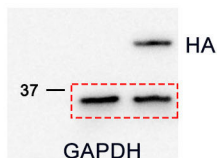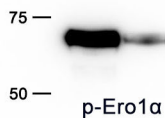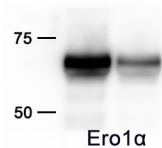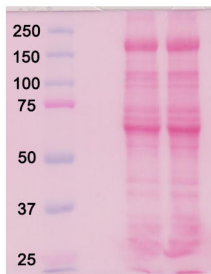

Ponceau

Figure 4E

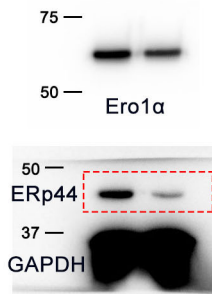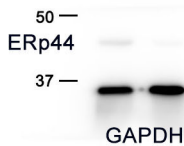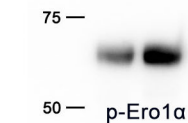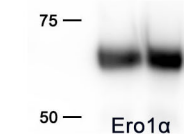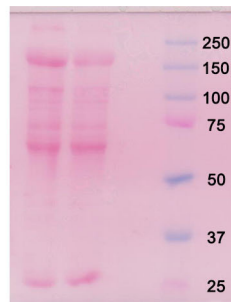

Ponceau
