# Supplementary material
Source: PubMed Central journal article supplement (PMC6043849)

Figure 1A

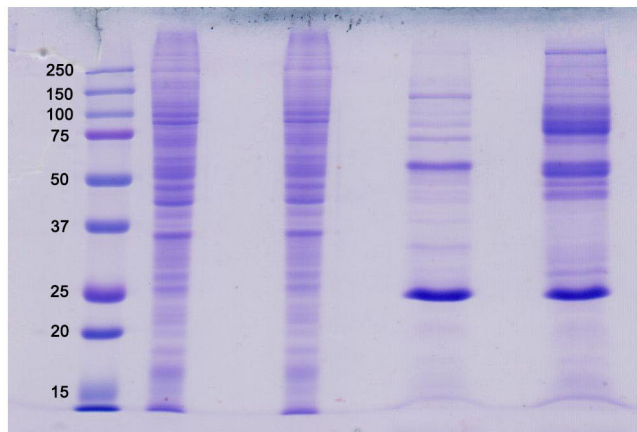

Figure 1G

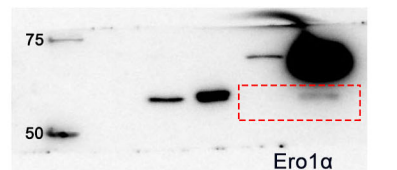

Figure 1D

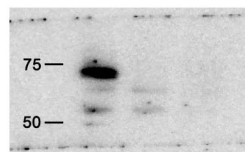

Flag

Figure 1E

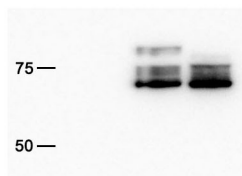

Fam20C

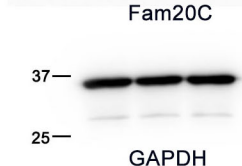

GAPDH

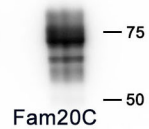

Fam20C

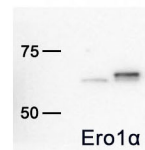

Ero1α

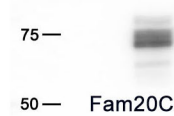

Fam20C

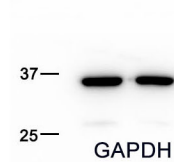

GAPDH

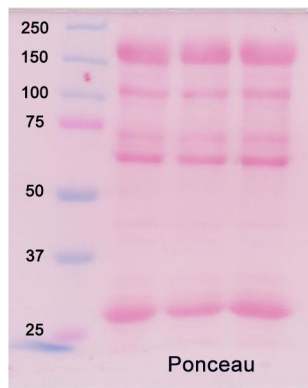

Ponceau

Supplement: EMBJ-37-e98699-s004.pdf [file EMBJ-37-e98699-s004.pdf]

Figure 2E

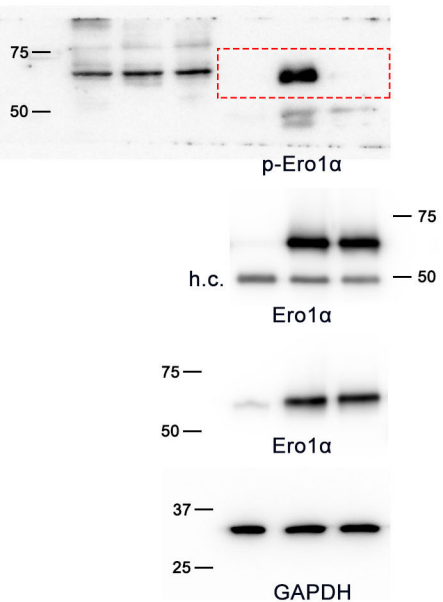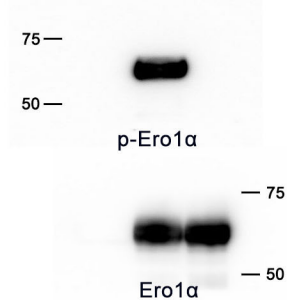

Figure 2F

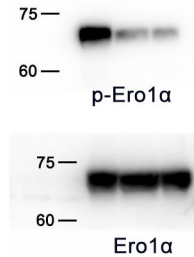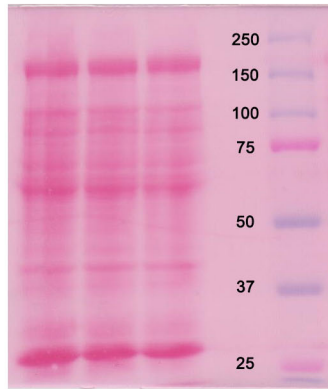

Ponceau

Supplement: EMBJ-37-e98699-s005.pdf [file EMBJ-37-e98699-s005.pdf]

Figure 3A

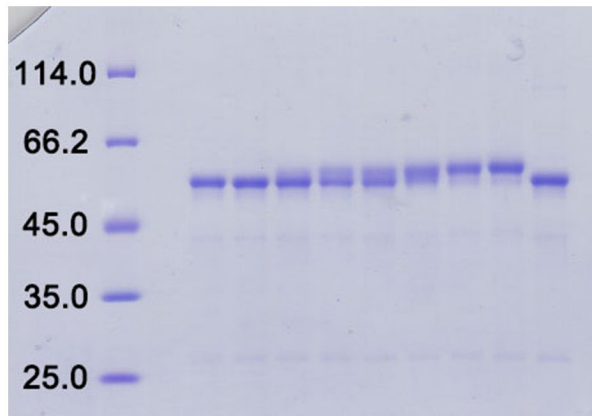

Coomassie blue

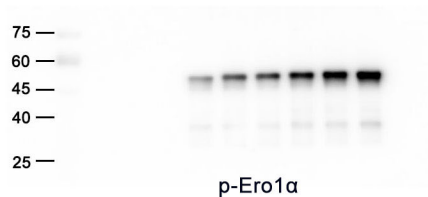

Figure 3B

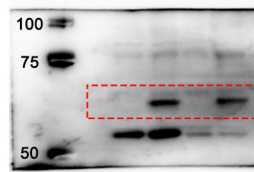

p-Ero1α

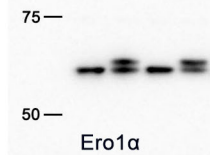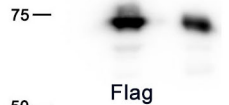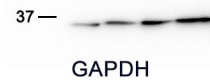

Figure 3C

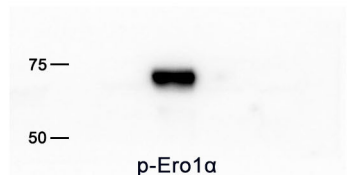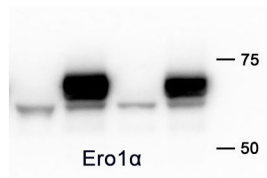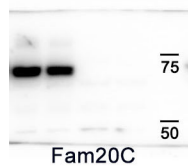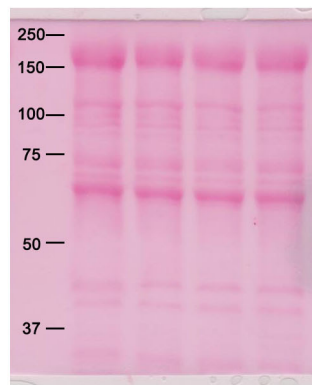

Ponceau

Figure 3D

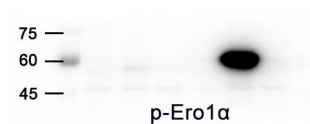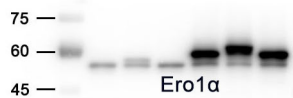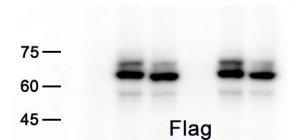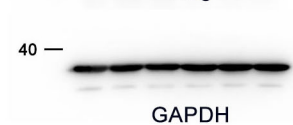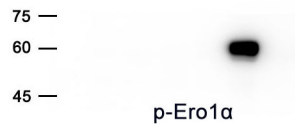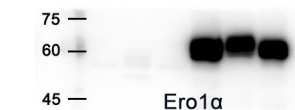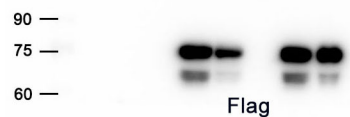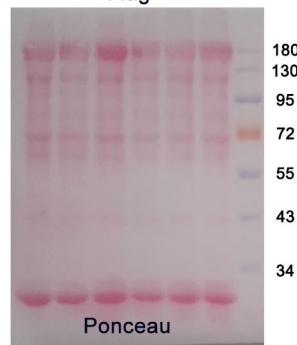

Ponceau

Supplement: EMBJ-37-e98699-s006.pdf [file EMBJ-37-e98699-s006.pdf]

Figure 6A

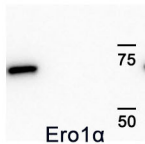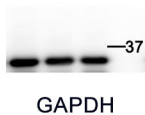

Figure 6B

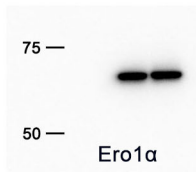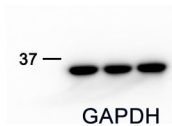

Figure 6C

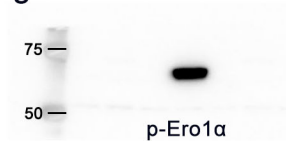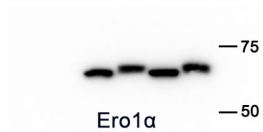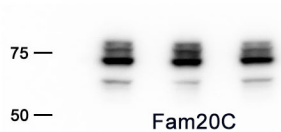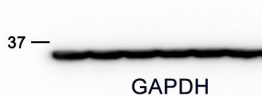

Supplement: EMBJ-37-e98699-s008.pdf [file EMBJ-37-e98699-s008.pdf]

Figure 7A

myc

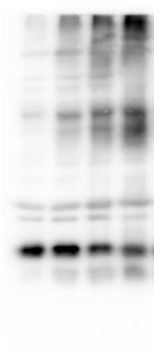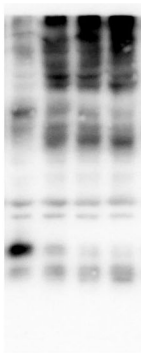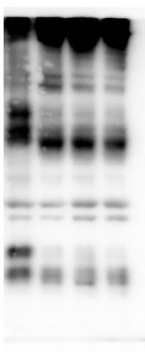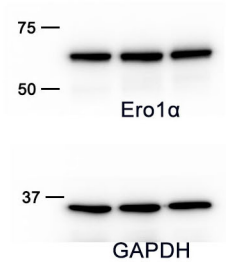

Figure 7C

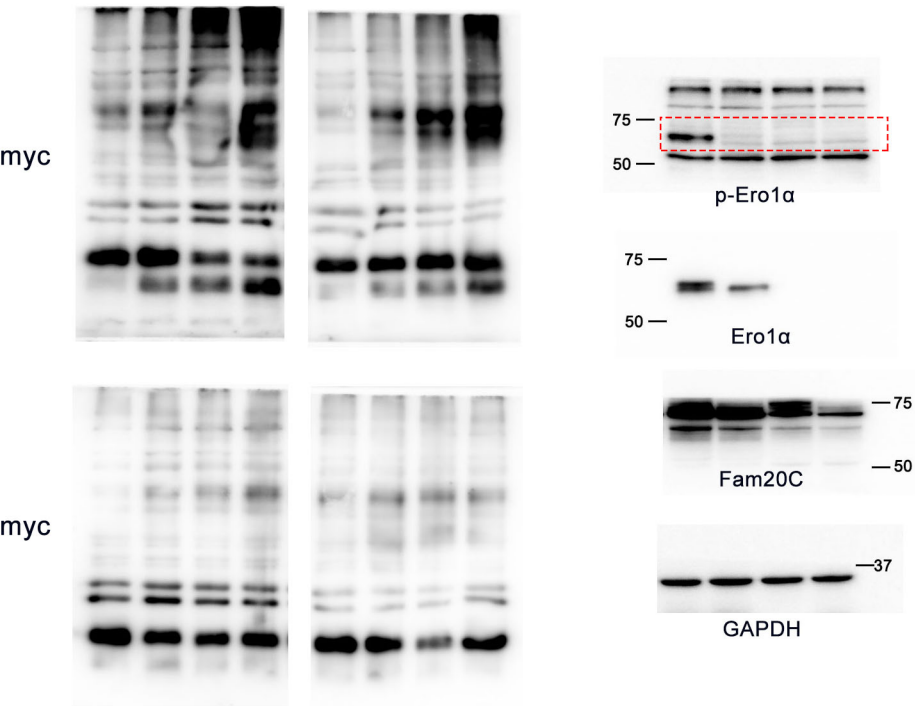

Supplement: EMBJ-37-e98699-s009.pdf [file EMBJ-37-e98699-s009.pdf]

Figure 8B

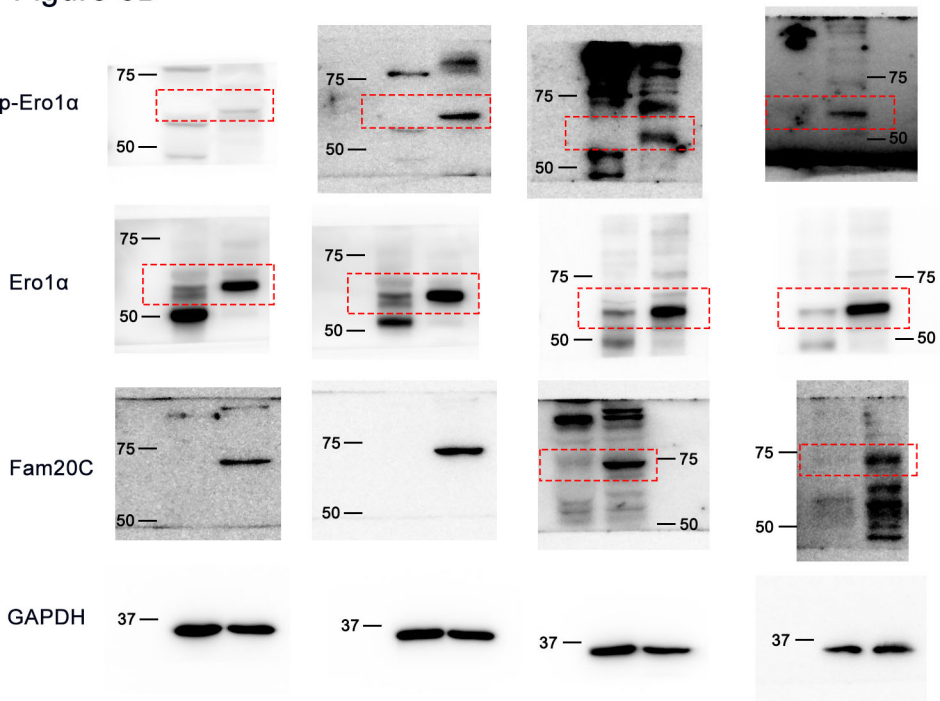

**Figure 8E**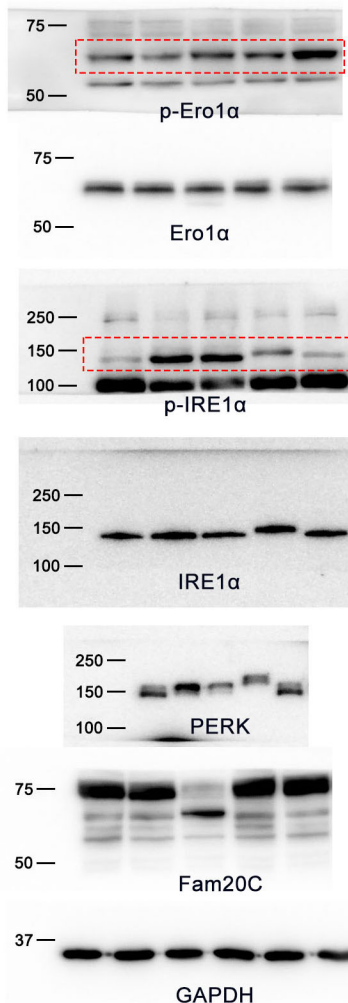**Figure 8F**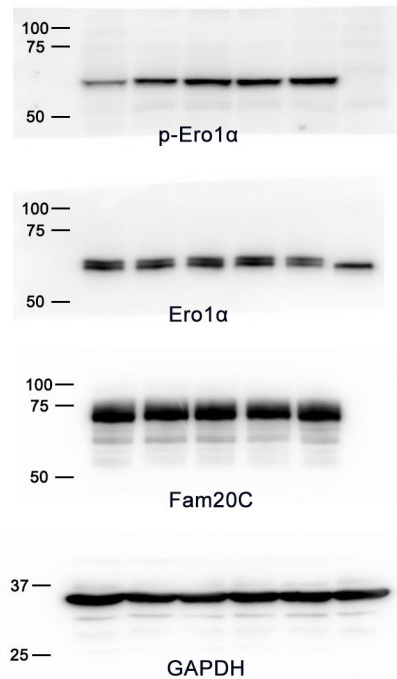**Figure 8D**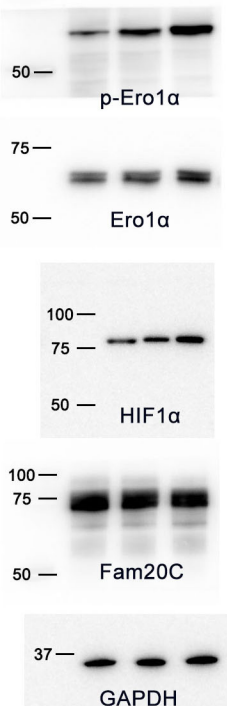

Supplement: EMBJ-37-e98699-s010.pdf [file EMBJ-37-e98699-s010.pdf]
